# Supplementary material for: A critical reappraisal for the value of tumor size as a prognostic variable in rectal adenocarcinoma
Source: PubMed Central journal article supplement — J Cancer. 2017 Jul 4;8(10):1927–34. doi: 10.7150/jca.17930 (PMC5556657; doi:10.7150/jca.17930), 2017-07-04
Supplement: jcav08p1927s1.pdf [file jcav08p1927s1.pdf]

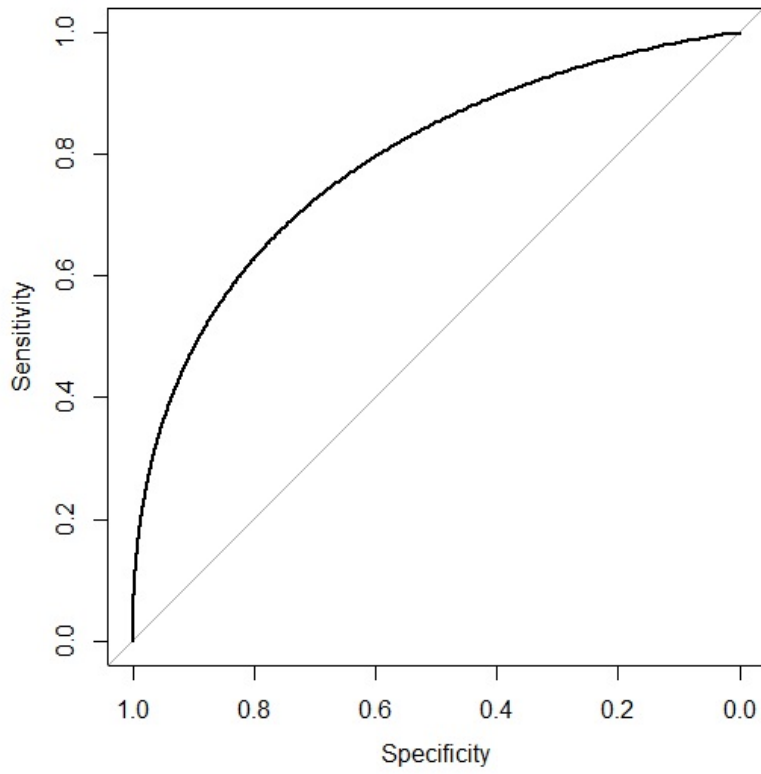

Supplemental Fig. 1. Receiver operating characteristic curve analysis for local recurrence prediction: tumor size.
